# Supplementary material
Source: Springer Nature journal article supplement (https://www.springermedizin.de/resource/supplementary/13020_2011_214_MOESM3_ESM.pdf/9641222)
Supplement: MOESM3 [file 9641222]

10                    20                    30                    40                    50                    60                    70  
 .....\*..... | .....\*..... | .....\*..... | .....\*..... | .....\*..... | .....\*..... | .....\*..... |

2KBH\_A            2   KD-----GY--IA-DDRNC<sup>P</sup>YFC-----GR<sub>n</sub>-AYCDGECKK-NRAESGYCQWAS--KYGNACWCYKLPDDA 55

query            21   AD-----GY--IR-GSNGCKISC-----LW<sub>gn</sub>EGCNKECKG-FGAYYG<sup>C</sup>WTW-----GLACWCEGLPDDk 72

gi 3287861       28   QGskcl<sup>k</sup>EYgg<sup>NV</sup>-GFSYCAPRI-----FP--SFCYRNC<sup>R</sup>K<sub>n</sub>KGAKGGRCRSGGagAGSMICLDYCSDKP 90

gi 134373        2   RD-----GY--IA-DDKDCAYFC-----GR<sub>n</sub>-AYCDEECKK--GAESGKCWYAG--QYGNACWCYKLPDWV 54

2EOH\_A            2   RD-----AY--IA-QNYNCVYHC-----AR<sub>d</sub>-AYCNELCTK-NGAKSGSCP<sup>Y</sup>LG--EHKFAC<sup>Y</sup>CKDLPDNV 55

gi 134355        2   RD-----GY--IA-QPENCVYHC-----FP<sub>gs</sub>SGCDTLCKE-KGATSGHCGFLP--GSGVACWCDNLPNKV 56

gi 2500709       2   RD-----GY--IV<sup>h</sup>DGTNCKYSCefgseYK---YCGPLCEK-KKAKTGYCYLFA-----CWCIEVPDEV 54

gi 20535852     2   RD-----GY--PV-DEKGCKLSC-----LI<sub>nd</sub>KWCNSACHS-RGGKYGYCYTGG-----LACYCEAVPDNV 53

gi 134344        21   AD-----GY--IR-KKDGCKVSC-----II<sub>gn</sub>EGCRKECVA-HGGSFGYCW<sup>T</sup>WG-----LACWCENLPDAV 72

gi 41018157     21   AD-----GY--IR-GSDGCKVSC-----LW<sub>gn</sub>D<sup>F</sup>CDKVCKK-SGGSYGYCW<sup>T</sup>WG-----LACWCEGLPDNE 72
